# Supplementary material
Source: MDPI journal article supplement (https://www.mdpi.com/2075-163X/12/2/162)
Supplement: s1 [file s1]

Table S1 Representative composition of clinopyroxene in Hujialin garnet clinopyroxenite (wt.%)

| Comment                        | HJ1-Q1-2   | HJ1-Q4-2 | HJ1-7-7.1 | HJ6-Q5-1 | HJ6-Q9-1 | Comment                        | HJ8-Q1-1   | HJ8-Q1-4 | HJ8-2-2.3 | HJ8-Q4-2 | HJ8-Q6-2 | HJ8-8-8.1 | HJ16-1-1.1 | HJ16-1-1.2 | HJ16-Q4-2 | HJ16-Q4-3 | HJ16-Q6-1 | HJ16-Q6-3 |
|--------------------------------|------------|----------|-----------|----------|----------|--------------------------------|------------|----------|-----------|----------|----------|-----------|------------|------------|-----------|-----------|-----------|-----------|
| Type-1 clinopyroxenite         |            |          |           |          |          | Type-2A clinopyroxenite        |            |          |           |          |          |           |            |            |           |           |           |           |
| Occurrence                     | inclusions |          |           |          |          | Occurrence                     | inclusions |          |           |          |          |           |            |            |           |           |           |           |
| SiO <sub>2</sub>               | 55.5       | 54.7     | 53.1      | 56.0     | 54.3     | SiO <sub>2</sub>               | 56.1       | 54.7     | 53.3      | 56.2     | 55.0     | 55.3      | 54.9       | 54.1       | 54.6      | 55.6      | 55.0      | 54.8      |
| TiO <sub>2</sub>               | 0.21       | 0.77     | 0.13      | 0.22     | 0.75     | TiO <sub>2</sub>               | 0.08       | B.D.     | 0.03      | 0.04     | B.D.     | 0.02      | B.D.       | 0.04       | 0.24      | 0.05      | 0.17      | 0.25      |
| Al <sub>2</sub> O <sub>3</sub> | 6.36       | 7.90     | 8.00      | 6.29     | 7.62     | Al <sub>2</sub> O <sub>3</sub> | 1.06       | 1.11     | 3.01      | 1.15     | 1.17     | 1.20      | 1.21       | 1.33       | 2.34      | 1.49      | 2.57      | 1.71      |
| Cr <sub>2</sub> O <sub>3</sub> | 0.02       | 0.07     | 0.04      | 0.05     | 0.04     | Cr <sub>2</sub> O <sub>3</sub> | 0.03       | 0.05     | 0.07      | 0.07     | 0.04     | B.D.      | 0.05       | 0.12       | 0.09      | 0.05      | 0.09      | 0.06      |
| FeO                            | 1.73       | 2.13     | 4.51      | 1.77     | 2.10     | FeO                            | 1.02       | 1.03     | 2.60      | 1.05     | 0.97     | 2.11      | 2.08       | 2.20       | 1.61      | 1.19      | 1.53      | 1.37      |
| MnO                            | B.D.       | B.D.     | B.D.      | 0.04     | 0.02     | MnO                            | 0.06       | 0.01     | 0.03      | 0.01     | B.D.     | 0.04      | 0.01       | B.D.       | B.D.      | 0.01      | B.D.      | B.D.      |
| MgO                            | 12.4       | 11.6     | 10.8      | 12.0     | 11.6     | MgO                            | 17.2       | 16.9     | 16.0      | 17.2     | 17.2     | 16.0      | 16.2       | 16.5       | 16.2      | 16.9      | 16.0      | 16.7      |
| CaO                            | 17.7       | 18.7     | 19.4      | 18.8     | 18.9     | CaO                            | 23.9       | 23.5     | 23.4      | 23.9     | 23.8     | 24.6      | 24.4       | 24.8       | 23.4      | 23.2      | 23.4      | 23.4      |
| Na <sub>2</sub> O              | 4.26       | 3.83     | 3.58      | 4.04     | 3.74     | Na <sub>2</sub> O              | 0.53       | 0.57     | 0.81      | 0.61     | 0.51     | 0.53      | 0.78       | 0.42       | 0.78      | 0.82      | 0.78      | 0.94      |
| K <sub>2</sub> O               | 0.01       | B.D.     | B.D.      | 0.02     | B.D.     | K <sub>2</sub> O               | 0.01       | 0.02     | 0.03      | 0.01     | 0.01     | 0.02      | 0.01       | B.D.       | 0.01      | B.D.      | B.D.      | B.D.      |
| Si                             | 2.01       | 1.96     | 1.93      | 2.01     | 1.96     | Si                             | 2.02       | 2.01     | 1.95      | 2.01     | 2.01     | 2.01      | 2.00       | 1.98       | 1.98      | 2.01      | 1.99      | 1.99      |
| Al(IV)                         | 0.00       | 0.04     | 0.07      | 0.00     | 0.04     | Al(IV)                         | 0.00       | 0.00     | 0.05      | 0.00     | 0.00     | 0.00      | 0.00       | 0.02       | 0.02      | 0.00      | 0.01      | 0.01      |
| Al(VI)                         | 0.27       | 0.29     | 0.28      | 0.27     | 0.28     | Al(VI)                         | 0.05       | 0.05     | 0.08      | 0.05     | 0.05     | 0.05      | 0.05       | 0.04       | 0.08      | 0.06      | 0.10      | 0.07      |
| Ti                             | 0.01       | 0.02     | 0.00      | 0.01     | 0.02     | Ti                             | 0.00       | 0.00     | 0.00      | 0.00     | 0.00     | 0.00      | 0.00       | 0.00       | 0.01      | 0.00      | 0.00      | 0.01      |
| Cr                             | 0.00       | 0.00     | 0.00      | 0.00     | 0.00     | Cr                             | 0.00       | 0.00     | 0.00      | 0.00     | 0.00     | 0.00      | 0.00       | 0.00       | 0.00      | 0.00      | 0.00      | 0.00      |
| Fe <sup>3+</sup>               | 0.00       | 0.00     | 0.05      | 0.00     | 0.00     | Fe <sup>3+</sup>               | 0.00       | 0.00     | 0.04      | 0.00     | 0.00     | 0.00      | 0.01       | 0.02       | 0.00      | 0.00      | 0.00      | 0.00      |
| Fe <sup>2+</sup>               | 0.05       | 0.06     | 0.09      | 0.05     | 0.06     | Fe <sup>2+</sup>               | 0.03       | 0.03     | 0.04      | 0.03     | 0.03     | 0.06      | 0.06       | 0.05       | 0.05      | 0.04      | 0.05      | 0.04      |
| Mn                             | 0.00       | 0.00     | 0.00      | 0.00     | 0.00     | Mn                             | 0.00       | 0.00     | 0.00      | 0.00     | 0.00     | 0.00      | 0.00       | 0.00       | 0.00      | 0.00      | 0.00      | 0.00      |
| Mg                             | 0.67       | 0.62     | 0.59      | 0.64     | 0.62     | Mg                             | 0.92       | 0.93     | 0.87      | 0.92     | 0.93     | 0.87      | 0.88       | 0.90       | 0.88      | 0.91      | 0.86      | 0.91      |
| Ca                             | 0.69       | 0.72     | 0.76      | 0.73     | 0.73     | Ca                             | 0.92       | 0.92     | 0.92      | 0.92     | 0.93     | 0.96      | 0.95       | 0.97       | 0.91      | 0.90      | 0.91      | 0.91      |
| Na                             | 0.30       | 0.27     | 0.25      | 0.28     | 0.26     | Na                             | 0.04       | 0.04     | 0.06      | 0.04     | 0.04     | 0.04      | 0.05       | 0.03       | 0.05      | 0.06      | 0.05      | 0.07      |
| K                              | 0.00       | 0.00     | 0.00      | 0.00     | 0.00     | K                              | 0.00       | 0.00     | 0.00      | 0.00     | 0.00     | 0.00      | 0.00       | 0.00       | 0.00      | 0.00      | 0.00      | 0.00      |
| WEF                            | 70         | 70       | 73        | 72       | 71       | Wo                             | 49.1       | 49.1     | 49.0      | 49.1     | 49.1     | 50.6      | 50.3       | 50.2       | 49.6      | 48.6      | 49.8      | 49.0      |
| Jd                             | 28         | 30       | 27        | 26       | 29       | En                             | 49.2       | 49.2     | 46.7      | 49.2     | 49.3     | 46.0      | 46.4       | 46.3       | 47.7      | 49.4      | 47.6      | 48.8      |
| Aeg                            | 3          | 0        | 0         | 1        | 0        | Fs                             | 1.73       | 1.70     | 4.28      | 1.70     | 1.57     | 3.46      | 3.34       | 3.47       | 2.66      | 1.97      | 2.56      | 2.24      |
| Mg#                            | 92.7       | 90.7     | 81.1      | 92.3     | 90.8     | Mg#                            | 0.97       | 0.97     | 0.92      | 0.97     | 0.97     | 0.93      | 0.93       | 0.93       | 0.95      | 0.96      | 0.95      | 0.96      |

Note:  $Jd = 100 \times Al^{VI} / (Na + Ca)$ ,  $Aeg = 100 \times (Na - Al^{VI}) / (Na + Ca)$ ,  $WEF = 100 - Jd - Ae$ .  $En = 100Mg^{2+} / (Mg^{2+} + Fe_{Total} + Ca^{2+})$ ,  $Fs = 100Fe_{Total} / (Mg^{2+} + Fe_{Total} + Ca^{2+})$ ,  $Wo = 100Ca^{2+} / (Mg^{2+} + Fe_{Total} + Ca^{2+})$ ,  $Mg^{\#} = Mg / (Mg + Fe_{Total})$ . "B.D." means below the limit of detection.

Continued Table S1

| Comment                        | HJ2-Q1-1   | HJ2-1-1.4 | HJ2-Q2-1 | HJ2-2-2.2 | HJ2-Q3-1 | HJ2-Q5-1 | HJ2-Q5-2 | HJ9-Q4-2   | HJ9-Q4-3 | HJ9-Q4-4 | HJ9-Q5-2 | HJ10-Q7-1  | HJ10-Q5-1 | HJ10-Q5-3 | HJ10-Q5-4 | HJ10-Q4-1 | HJ10-Q2-1 | HJ10-Q2-2 | HJ-10-1-1.1 |
|--------------------------------|------------|-----------|----------|-----------|----------|----------|----------|------------|----------|----------|----------|------------|-----------|-----------|-----------|-----------|-----------|-----------|-------------|
| Type-2B clinopyroxenite        |            |           |          |           |          |          |          |            |          |          |          |            |           |           |           |           |           |           |             |
| Occurrence                     | inclusions |           |          |           |          |          |          | inclusions |          |          |          | inclusions |           |           |           |           |           |           |             |
| SiO <sub>2</sub>               | 55.3       | 55.3      | 54.3     | 55.0      | 56.3     | 56.0     | 55.3     | 54.1       | 54.5     | 55.3     | 55.3     | 54.7       | 53.4      | 56.0      | 55.4      | 55.8      | 55.9      | 56.2      | 53.9        |
| TiO <sub>2</sub>               | 0.11       | 0.03      | 0.12     | 0.03      | 0.02     | 0.01     | B.D.     | 0.10       | 0.24     | 0.05     | 0.13     | 0.24       | 0.19      | 0.02      | B.D.      | 0.04      | B.D.      | 0.08      | 0.02        |
| Al <sub>2</sub> O <sub>3</sub> | 1.09       | 1.03      | 1.30     | 1.21      | 1.01     | 1.01     | 1.06     | 2.68       | 3.13     | 1.03     | 1.92     | 1.73       | 2.34      | 0.73      | 0.87      | 0.96      | 0.80      | 0.87      | 2.96        |
| Cr <sub>2</sub> O <sub>3</sub> | 0.05       | 0.17      | 0.04     | 0.16      | 0.02     | 0.08     | 0.10     | 0.10       | 0.11     | 0.08     | 0.09     | 0.05       | 0.05      | 0.03      | 0.04      | 0.04      | 0.02      | 0.06      | 0.06        |
| FeO                            | 1.22       | 2.07      | 1.17     | 2.47      | 1.11     | 1.06     | 1.24     | 1.48       | 1.49     | 1.14     | 1.22     | 1.11       | 1.83      | 0.94      | 0.99      | 1.14      | 1.02      | 1.09      | 2.96        |
| MnO                            | B.D.       | 0.01      | 0.02     | 0.01      | B.D.     | B.D.     | 0.02     | 0.01       | B.D.     | 0.07     | 0.02     | 0.01       | 0.07      | 0.01      | B.D.      | 0.03      | 0.04      | B.D.      | 0.02        |
| MgO                            | 16.8       | 15.9      | 16.6     | 15.7      | 16.9     | 17.0     | 16.9     | 16.5       | 15.9     | 17.4     | 17.0     | 16.9       | 16.2      | 17.5      | 17.4      | 17.2      | 17.4      | 17.5      | 15.7        |
| CaO                            | 23.6       | 24.4      | 23.2     | 23.8      | 23.4     | 23.5     | 23.7     | 23.4       | 23.4     | 23.9     | 23.1     | 23.7       | 23.7      | 24.1      | 23.8      | 24.2      | 23.9      | 24.0      | 23.5        |
| Na <sub>2</sub> O              | 0.64       | 0.66      | 0.90     | 0.66      | 0.73     | 0.77     | 0.74     | 0.58       | 0.62     | 0.52     | 0.68     | 0.61       | 0.50      | 0.55      | 0.51      | 0.54      | 0.56      | 0.60      | 0.67        |
| K <sub>2</sub> O               | B.D.       | B.D.      | 0.01     | B.D.      | 0.01     | 0.01     | B.D.     | B.D.       | 0.02     | 0.02     | 0.02     | B.D.       | 0.01      | 0.02      | B.D.      | B.D.      | B.D.      | 0.02      | 0.04        |
| Si                             | 2.01       | 2.01      | 2.00     | 2.01      | 2.03     | 2.02     | 2.01     | 1.97       | 1.97     | 2.00     | 2.00     | 1.99       | 1.97      | 2.02      | 2.01      | 2.01      | 2.02      | 2.01      | 1.96        |
| Al(IV)                         | 0.00       | 0.00      | 0.00     | 0.00      | 0.00     | 0.00     | 0.00     | 0.03       | 0.03     | 0.00     | 0.00     | 0.01       | 0.03      | 0.00      | 0.00      | 0.00      | 0.00      | 0.00      | 0.04        |
| Al(VI)                         | 0.05       | 0.04      | 0.06     | 0.05      | 0.04     | 0.04     | 0.05     | 0.08       | 0.11     | 0.04     | 0.08     | 0.06       | 0.07      | 0.03      | 0.04      | 0.04      | 0.03      | 0.04      | 0.09        |
| Ti                             | 0.00       | 0.00      | 0.00     | 0.00      | 0.00     | 0.00     | 0.00     | 0.00       | 0.01     | 0.00     | 0.00     | 0.01       | 0.01      | 0.00      | 0.00      | 0.00      | 0.00      | 0.00      | 0.00        |
| Cr                             | 0.00       | 0.00      | 0.00     | 0.00      | 0.00     | 0.00     | 0.00     | 0.00       | 0.00     | 0.00     | 0.00     | 0.00       | 0.00      | 0.00      | 0.00      | 0.00      | 0.00      | 0.00      | 0.00        |
| Fe <sup>3+</sup>               | 0.00       | 0.00      | 0.00     | 0.00      | 0.00     | 0.00     | 0.00     | 0.00       | 0.00     | 0.00     | 0.00     | 0.00       | 0.00      | 0.00      | 0.00      | 0.00      | 0.00      | 0.00      | 0.00        |
| Fe <sup>2+</sup>               | 0.04       | 0.06      | 0.04     | 0.08      | 0.03     | 0.03     | 0.04     | 0.05       | 0.05     | 0.03     | 0.04     | 0.03       | 0.06      | 0.03      | 0.03      | 0.03      | 0.03      | 0.03      | 0.09        |
| Mn                             | 0.00       | 0.00      | 0.00     | 0.00      | 0.00     | 0.00     | 0.00     | 0.00       | 0.00     | 0.00     | 0.00     | 0.00       | 0.00      | 0.00      | 0.00      | 0.00      | 0.00      | 0.00      | 0.00        |
| Mg                             | 0.91       | 0.86      | 0.91     | 0.86      | 0.91     | 0.92     | 0.92     | 0.90       | 0.86     | 0.94     | 0.92     | 0.92       | 0.89      | 0.94      | 0.94      | 0.93      | 0.94      | 0.93      | 0.85        |
| Ca                             | 0.92       | 0.95      | 0.92     | 0.93      | 0.90     | 0.91     | 0.92     | 0.91       | 0.91     | 0.93     | 0.89     | 0.92       | 0.94      | 0.93      | 0.93      | 0.93      | 0.92      | 0.92      | 0.92        |
| Na                             | 0.05       | 0.05      | 0.06     | 0.05      | 0.05     | 0.05     | 0.05     | 0.04       | 0.04     | 0.04     | 0.05     | 0.04       | 0.04      | 0.04      | 0.04      | 0.04      | 0.04      | 0.04      | 0.05        |
| K                              | 0.00       | 0.00      | 0.00     | 0.00      | 0.00     | 0.00     | 0.00     | 0.00       | 0.00     | 0.00     | 0.00     | 0.00       | 0.00      | 0.00      | 0.00      | 0.00      | 0.00      | 0.00      | 0.00        |
| Wo                             | 49.2       | 50.7      | 49.0     | 50.0      | 48.9     | 49.0     | 49.1     | 49.2       | 50.2     | 48.7     | 48.4     | 49.3       | 49.7      | 49.1      | 48.7      | 49.3      | 48.8      | 48.8      | 49.3        |
| En                             | 48.8       | 45.9      | 49.0     | 45.9      | 49.2     | 49.3     | 48.8     | 48.4       | 47.3     | 49.4     | 49.6     | 48.9       | 47.1      | 49.4      | 49.7      | 48.9      | 49.5      | 49.4      | 45.8        |
| Fs                             | 2.00       | 3.38      | 1.98     | 4.10      | 1.83     | 1.73     | 2.05     | 2.44       | 2.51     | 1.92     | 2.03     | 1.83       | 3.12      | 1.52      | 1.59      | 1.87      | 1.69      | 1.74      | 4.88        |
| Mg#                            | 0.96       | 0.93      | 0.96     | 0.92      | 0.96     | 0.97     | 0.96     | 0.95       | 0.95     | 0.96     | 0.96     | 0.96       | 0.94      | 0.97      | 0.97      | 0.96      | 0.97      | 0.97      | 0.90        |

Continued Table S1

| Comment                        | HJ-10-1-1.2 | HJ12-Q5-2       | HJ12-Q5-3 | HJ12-Q5-4 | HJ12-Q8-2 | HJ19-Q2-1 | HJ19-Q5-2 | HJ19-Q7-2 | HJ19-Q7-3 |
|--------------------------------|-------------|-----------------|-----------|-----------|-----------|-----------|-----------|-----------|-----------|
|                                | Type-2B     | clinopyroxenite |           |           |           |           |           |           |           |
| Occurrence                     | inclusions  |                 |           |           |           |           |           |           |           |
| SiO <sub>2</sub>               | 53.5        | 55.3            | 55.8      | 55.5      | 55.7      | 56.0      | 54.6      | 55.1      | 54.8      |
| TiO <sub>2</sub>               | 0.03        | 0.10            | 0.01      | 0.04      | 0.05      | B.D.      | B.D.      | 0.02      | 0.05      |
| Al <sub>2</sub> O <sub>3</sub> | 2.06        | 1.05            | 0.74      | 0.96      | 0.97      | 0.96      | 0.72      | 0.94      | 0.76      |
| Cr <sub>2</sub> O <sub>3</sub> | 0.08        | 0.03            | 0.06      | 0.01      | 0.01      | 0.08      | 0.08      | 0.03      | 0.09      |
| FeO                            | 2.74        | 1.15            | 0.95      | 1.05      | 1.20      | 1.28      | 1.30      | 1.18      | 1.05      |
| MnO                            | 0.05        | 0.03            | B.D.      | 0.05      | B.D.      | 0.01      | B.D.      | 0.09      | B.D.      |
| MgO                            | 15.8        | 17.4            | 17.6      | 17.6      | 17.5      | 17.2      | 16.6      | 17.2      | 16.8      |
| CaO                            | 24.6        | 23.9            | 23.9      | 24.2      | 24.2      | 23.9      | 23.7      | 23.8      | 23.9      |
| Na <sub>2</sub> O              | 0.58        | 0.49            | 0.59      | 0.38      | 0.52      | 0.52      | 0.47      | 0.52      | 0.56      |
| K <sub>2</sub> O               | B.D.        | B.D.            | 0.02      | B.D.      | B.D.      | 0.01      | 0.01      | 0.01      | 0.01      |
| Si                             | 1.96        | 2.00            | 2.02      | 2.00      | 2.00      | 2.02      | 2.02      | 2.01      | 2.02      |
| Al(IV)                         | 0.04        | 0.00            | 0.00      | 0.00      | 0.00      | 0.00      | 0.00      | 0.00      | 0.00      |
| Al(VI)                         | 0.05        | 0.04            | 0.03      | 0.04      | 0.04      | 0.04      | 0.03      | 0.04      | 0.03      |
| Ti                             | 0.00        | 0.00            | 0.00      | 0.00      | 0.00      | 0.00      | 0.00      | 0.00      | 0.00      |
| Cr                             | 0.00        | 0.00            | 0.00      | 0.00      | 0.00      | 0.00      | 0.00      | 0.00      | 0.00      |
| Fe <sup>3+</sup>               | 0.04        | 0.00            | 0.00      | 0.00      | 0.00      | 0.00      | 0.00      | 0.00      | 0.00      |
| Fe <sup>2+</sup>               | 0.04        | 0.03            | 0.03      | 0.03      | 0.04      | 0.04      | 0.04      | 0.04      | 0.03      |
| Mn                             | 0.00        | 0.00            | 0.00      | 0.00      | 0.00      | 0.00      | 0.00      | 0.00      | 0.00      |
| Mg                             | 0.87        | 0.94            | 0.94      | 0.95      | 0.94      | 0.92      | 0.91      | 0.94      | 0.92      |
| Ca                             | 0.97        | 0.93            | 0.92      | 0.94      | 0.93      | 0.92      | 0.94      | 0.93      | 0.94      |
| Na                             | 0.04        | 0.03            | 0.04      | 0.03      | 0.04      | 0.04      | 0.03      | 0.04      | 0.04      |
| K                              | 0.00        | 0.00            | 0.00      | 0.00      | 0.00      | 0.00      | 0.00      | 0.00      | 0.00      |
| Wo                             | 50.5        | 48.7            | 48.7      | 48.9      | 48.9      | 48.9      | 49.6      | 48.8      | 49.8      |
| En                             | 45.1        | 49.4            | 49.8      | 49.4      | 49.2      | 49.0      | 48.3      | 49.2      | 48.5      |
| Fs                             | 4.43        | 1.87            | 1.51      | 1.74      | 1.91      | 2.09      | 2.13      | 2.05      | 1.72      |
| Mg#                            | 0.91        | 0.96            | 0.97      | 0.97      | 0.96      | 0.96      | 0.96      | 0.96      | 0.97      |

Table S2 Representative composition of garnet in Hujialin garnet clinopyroxenite (wt.%)

| Comment                        | HJ1-Q1-1               | HJ1-Q4-1 | HJ1-Q5-1 | HJ1-Q5-2 | HJ1-7-7.2 | HJ6-Q5-2                | HJ8-Q1-2 | HJ8-Q2-2 | HJ16-Q4-1 | HJ16-Q6-2 | HJ2-Q2-2                | HJ2-Q5-21 | HJ2-Q5-22 | HJ9-Q4-1 | HJ9-Q5-3 | HJ10-Q5-2 | HJ10-Q3-1 | HJ12-Q5-1 | HJ12-Q8-1 | HJ19-Q5-1 | HJ19-Q7-1 |
|--------------------------------|------------------------|----------|----------|----------|-----------|-------------------------|----------|----------|-----------|-----------|-------------------------|-----------|-----------|----------|----------|-----------|-----------|-----------|-----------|-----------|-----------|
|                                | Type-1 clinopyroxenite |          |          |          |           | Type-2A clinopyroxenite |          |          |           |           | Type-2B clinopyroxenite |           |           |          |          |           |           |           |           |           |           |
| SiO <sub>2</sub>               | 40.4                   | 40.0     | 40.0     | 39.7     | 38.4      | 39.6                    | 40.6     | 40.5     | 39.8      | 39.5      | 40.5                    | 38.9      | 38.8      | 40.1     | 39.9     | 39.8      | 40.2      | 40.4      | 40.6      | 40.2      | 39.7      |
| TiO <sub>2</sub>               | 0.20                   | 0.26     | 0.24     | 0.24     | 0.08      | 0.19                    | 0.11     | 0.12     | 0.11      | 0.10      | 0.07                    | 0.02      | B.D.      | 0.10     | 0.12     | 0.12      | 0.11      | 0.12      | 0.06      | 0.12      | 0.18      |
| Al <sub>2</sub> O <sub>3</sub> | 21.3                   | 21.5     | 21.2     | 21.1     | 21.7      | 21.1                    | 21.4     | 21.1     | 20.9      | 20.9      | 21.2                    | 21.3      | 21.3      | 21.6     | 21.3     | 21.2      | 21.3      | 21.2      | 21.0      | 20.8      | 20.6      |
| FeO                            | 11.5                   | 12.5     | 10.6     | 11.0     | 13.4      | 12.7                    | 10.4     | 11.8     | 10.8      | 10.8      | 13.4                    | 15.7      | 15.8      | 9.7      | 10.8     | 11.8      | 12.2      | 11.5      | 12.0      | 12.6      | 12.5      |
| MnO                            | 0.01                   | B.D.     | 0.05     | 0.02     | 0.08      | 0.02                    | B.D.     | 0.02     | 0.03      | 0.06      | 0.08                    | 0.31      | 0.36      | 0.04     | 0.03     | 0.09      | 0.13      | B.D.      | 0.08      | 0.12      | 0.09      |
| MgO                            | 6.73                   | 6.90     | 5.57     | 5.47     | 5.55      | 6.85                    | 10.4     | 8.75     | 8.03      | 7.75      | 10.3                    | 10.2      | 9.39      | 11.5     | 10.8     | 9.01      | 9.71      | 8.97      | 7.94      | 9.02      | 8.50      |
| CaO                            | 19.6                   | 18.9     | 21.6     | 21.2     | 21.5      | 18.3                    | 15.7     | 17.4     | 18.8      | 18.7      | 13.3                    | 13.9      | 14.9      | 14.8     | 14.6     | 16.3      | 15.1      | 16.9      | 18.4      | 15.9      | 16.2      |
| Total                          | 99.7                   | 100.1    | 99.2     | 98.8     | 100.7     | 98.7                    | 98.6     | 99.7     | 98.5      | 97.8      | 98.9                    | 100.3     | 100.5     | 97.8     | 97.5     | 98.3      | 98.7      | 99.1      | 100.1     | 98.8      | 97.8      |
| Si                             | 6.08                   | 6.03     | 6.07     | 6.06     | 5.84      | 6.04                    | 6.09     | 6.07     | 6.05      | 6.05      | 6.09                    | 5.87      | 5.87      | 6.02     | 6.05     | 6.04      | 6.06      | 6.08      | 6.08      | 6.09      | 6.08      |
| Ti                             | 0.02                   | 0.03     | 0.03     | 0.03     | 0.01      | 0.02                    | 0.01     | 0.01     | 0.01      | 0.01      | 0.01                    | 0.00      | 0.00      | 0.01     | 0.01     | 0.01      | 0.01      | 0.01      | 0.01      | 0.01      | 0.02      |
| Al                             | 3.78                   | 3.81     | 3.79     | 3.80     | 3.88      | 3.80                    | 3.78     | 3.73     | 3.74      | 3.77      | 3.76                    | 3.79      | 3.80      | 3.82     | 3.80     | 3.79      | 3.78      | 3.76      | 3.72      | 3.71      | 3.72      |
| Fe <sup>2+</sup>               | 1.45                   | 1.58     | 1.34     | 1.41     | 1.70      | 1.63                    | 1.30     | 1.48     | 1.37      | 1.38      | 1.69                    | 1.98      | 1.99      | 1.21     | 1.37     | 1.50      | 1.54      | 1.44      | 1.51      | 1.60      | 1.61      |
| Mn                             | 0.00                   | 0.00     | 0.01     | 0.00     | 0.01      | 0.00                    | 0.00     | 0.00     | 0.00      | 0.01      | 0.01                    | 0.04      | 0.05      | 0.01     | 0.00     | 0.01      | 0.02      | 0.00      | 0.01      | 0.02      | 0.01      |
| Mg                             | 1.51                   | 1.55     | 1.26     | 1.25     | 1.26      | 1.56                    | 2.31     | 1.96     | 1.82      | 1.77      | 2.31                    | 2.29      | 2.12      | 2.59     | 2.43     | 2.04      | 2.18      | 2.01      | 1.77      | 2.04      | 1.94      |
| Ca                             | 3.17                   | 3.04     | 3.51     | 3.47     | 3.51      | 2.99                    | 2.52     | 2.80     | 3.06      | 3.07      | 2.15                    | 2.25      | 2.41      | 2.39     | 2.37     | 2.65      | 2.44      | 2.73      | 2.96      | 2.58      | 2.66      |
| Total                          | 16.0                   | 16.0     | 16.0     | 16.0     | 16.2      | 16.0                    | 16.0     | 16.1     | 16.1      | 16.1      | 16.0                    | 16.2      | 16.2      | 16.1     | 16.0     | 16.1      | 16.0      | 16.0      | 16.1      | 16.0      | 16.0      |
| Prp                            | 25                     | 25       | 21       | 20       | 19        | 25                      | 38       | 31       | 29        | 28        | 38                      | 35        | 32        | 42       | 39       | 33        | 35        | 33        | 28        | 33        | 31        |
| Alm                            | 24                     | 26       | 22       | 23       | 26        | 26                      | 21       | 24       | 22        | 22        | 27                      | 30        | 30        | 20       | 22       | 24        | 25        | 23        | 24        | 26        | 26        |
| Gro                            | 52                     | 49       | 57       | 57       | 54        | 48                      | 41       | 45       | 49        | 49        | 35                      | 34        | 37        | 39       | 38       | 43        | 40        | 44        | 47        | 41        | 43        |
| Spe                            | 0                      | 0        | 0        | 0        | 0         | 0                       | 0        | 0        | 0         | 0         | 0                       | 1         | 1         | 0        | 0        | 0         | 0         | 0         | 0         | 0         | 0         |

Note: "B.D." means below the limit of detection.

Table S3 Representative composition of olivine in Hujialin dunite (wt.%)

| Comment                        | HJ20-Q2-3 | HJ20-Q4-2 | HJ20-Q4-3 | HJ23-Q1-3 | HJ23-Q2-2 | HJ23-Q4-3 | HJ23-Q4-4 | HJ25-Q1-1 | HJ25-Q1-2 | HJ25-Q2-3 | HJ25-Q4-2 | HJ27-Q5-2 | HJ27-Q8-2 | HJ28-Q1-3 | HJ28-Q4-3 | HJ28-Q4-4 | HJ28-Q5-1-4 | HJ29-Q1-2 | HJ29-Q2-3 | HJ29-Q3-3 | HJ29-Q5-2 |
|--------------------------------|-----------|-----------|-----------|-----------|-----------|-----------|-----------|-----------|-----------|-----------|-----------|-----------|-----------|-----------|-----------|-----------|-------------|-----------|-----------|-----------|-----------|
| SiO <sub>2</sub>               | 40.6      | 41.1      | 40.8      | 41.3      | 40.6      | 40.6      | 41.8      | 41.1      | 41.3      | 41.2      | 41.1      | 40.8      | 41.6      | 41.7      | 41.2      | 41.8      | 41.3        | 42.0      | 41.2      | 41.3      | 41.6      |
| TiO <sub>2</sub>               | 0.02      | 0.02      | 0.03      | B.D.      | B.D.      | 0.06      | B.D.      | B.D.      | 0.03      | 0.05      | B.D.      | 0.05      | B.D.      | 0.03      | B.D.      | B.D.      | B.D.        | 0.02      | 0.05      | B.D.      | B.D.      |
| Al <sub>2</sub> O <sub>3</sub> | B.D.      | 0.01      | 0.02      | B.D.      | 0.01      | B.D.      | 0.01      | B.D.      | 0.03      | B.D.      | B.D.      | B.D.      | 0.01      | 0.01      | B.D.      | B.D.      | B.D.        | B.D.      | 0.01      | B.D.      | B.D.      |
| Cr <sub>2</sub> O <sub>3</sub> | B.D.      | 0.06      | 0.01      | 0.04      | B.D.      | B.D.      | B.D.      | B.D.      | B.D.      | 0.02      | 0.03      | B.D.      | 0.01      | B.D.      | 0.01      | B.D.      | 0.01        | B.D.      | B.D.      | 0.03      | 0.04      |
| FeO                            | 6.56      | 6.77      | 6.77      | 6.89      | 6.42      | 6.34      | 5.96      | 6.33      | 6.42      | 6.72      | 6.31      | 6.78      | 6.84      | 6.93      | 6.29      | 6.92      | 6.44        | 6.22      | 6.49      | 6.63      | 6.68      |
| MnO                            | B.D.      | 0.01      | 0.07      | 0.03      | 0.02      | 0.02      | B.D.      | 0.02      | 0.10      | 0.02      | 0.02      | 0.07      | B.D.      | 0.02      | 0.06      | B.D.      | 0.09        | 0.01      | B.D.      | 0.06      | 0.05      |
| MgO                            | 51.7      | 51.6      | 52.0      | 52.1      | 52.1      | 52.4      | 53.0      | 52.1      | 52.7      | 52.5      | 52.5      | 51.8      | 51.8      | 52.4      | 52.4      | 51.7      | 52.2        | 51.4      | 51.7      | 51.1      | 51.0      |
| CaO                            | 0.02      | 0.01      | B.D.      | 0.01      | B.D.      | B.D.      | B.D.      | B.D.      | 0.01      | B.D.        | B.D.      | B.D.      | 0.01      | B.D.      |
| NiO                            | 0.20      | 0.24      | 0.22      | 0.18      | 0.23      | 0.22      | 0.20      | 0.18      | 0.25      | 0.20      | 0.25      | 0.19      | 0.22      | 0.21      | 0.22      | 0.25      | 0.28        | 0.20      | 0.11      | 0.24      | 0.29      |
| Total                          | 99.1      | 99.8      | 99.9      | 100.5     | 99.4      | 99.6      | 101.1     | 99.9      | 100.8     | 100.8     | 100.2     | 99.7      | 100.5     | 101.3     | 100.1     | 100.7     | 100.3       | 99.8      | 99.6      | 99.4      | 99.7      |
| Si                             | 0.99      | 1.00      | 0.99      | 0.99      | 0.99      | 0.99      | 1.00      | 0.99      | 0.99      | 0.99      | 0.99      | 0.99      | 1.00      | 1.00      | 0.99      | 1.00      | 0.99        | 1.01      | 1.00      | 1.00      | 1.01      |
| Fe <sup>2+</sup>               | 0.13      | 0.14      | 0.14      | 0.14      | 0.13      | 0.13      | 0.12      | 0.13      | 0.13      | 0.13      | 0.13      | 0.14      | 0.14      | 0.14      | 0.13      | 0.14      | 0.13        | 0.13      | 0.13      | 0.13      | 0.14      |
| Mg                             | 1.88      | 1.86      | 1.88      | 1.87      | 1.89      | 1.89      | 1.88      | 1.88      | 1.88      | 1.88      | 1.89      | 1.87      | 1.86      | 1.87      | 1.88      | 1.85      | 1.87        | 1.84      | 1.87      | 1.85      | 1.84      |
| Total                          | 3.01      | 3.00      | 3.01      | 3.01      | 3.01      | 3.01      | 3.00      | 3.01      | 3.01      | 3.01      | 3.01      | 3.01      | 3.00      | 3.00      | 3.01      | 3.00      | 3.01        | 2.99      | 3.00      | 3.00      | 2.99      |
| Fo                             | 93.4      | 93.1      | 93.2      | 93.1      | 93.5      | 93.6      | 94.1      | 93.6      | 93.6      | 93.3      | 93.7      | 93.2      | 93.1      | 93.1      | 93.7      | 93.0      | 93.5        | 93.6      | 93.4      | 93.2      | 93.2      |

Note: Fo is the forsterite component, 100\*(Mg/[Mg+Fe]). "B.D." means below the limit of detection.

Table S4 Representative composition of chromite in Hujialin dunite (wt.%)

| Comment                        | HJ20-Q2-1 | HJ20-Q4-1 | HJ23-Q1-1 | HJ23-Q1-4 | HJ23-Q2-1 | HJ23-Q4-1 | HJ25-Q2-1 | HJ25-Q4-1 | HJ27-Q5-1 | HJ27-Q8-1 | HJ28-Q1-1 | HJ28-Q4-1 | HJ28-Q5-1-2 | HJ29-Q2-1 | HJ29-Q3-1 | HJ29-Q5-1 |
|--------------------------------|-----------|-----------|-----------|-----------|-----------|-----------|-----------|-----------|-----------|-----------|-----------|-----------|-------------|-----------|-----------|-----------|
| TiO <sub>2</sub>               | 0.04      | 0.88      | 0.28      | B.D.      | 0.02      | 0.10      | 0.12      | 0.11      | 0.33      | 0.22      | 0.10      | 0.04      | 0.25        | 0.21      | 0.27      | 0.06      |
| Al <sub>2</sub> O <sub>3</sub> | 12.2      | 1.58      | 11.1      | 9.13      | 5.67      | 9.76      | 8.12      | 6.96      | 4.86      | 11.2      | 12.5      | 10.3      | 12.1        | 5.52      | 8.45      | 4.09      |
| Cr <sub>2</sub> O <sub>3</sub> | 55.5      | 53.8      | 58.1      | 59.8      | 61.1      | 52.3      | 60.0      | 61.5      | 54.9      | 57.4      | 56.8      | 57.5      | 56.7        | 57.7      | 54.3      | 57.9      |
| FeO                            | 23.3      | 37.5      | 20.3      | 22.2      | 26.2      | 29.3      | 24.0      | 23.4      | 34.1      | 21.0      | 20.8      | 23.8      | 20.9        | 30.0      | 29.1      | 31.2      |
| MnO                            | 0.32      | 0.26      | 0.22      | 0.16      | 0.18      | 0.22      | 0.17      | 0.20      | 0.24      | 0.24      | 0.18      | 0.18      | 0.27        | 0.23      | 0.19      | 0.21      |
| MgO                            | 7.62      | 4.04      | 8.60      | 7.99      | 5.05      | 6.92      | 5.98      | 6.79      | 4.02      | 7.85      | 8.14      | 6.73      | 8.40        | 4.98      | 6.08      | 4.96      |
| Na <sub>2</sub> O              | 0.02      | 0.05      | 0.01      | 0.04      | 0.03      | 0.07      | 0.02      | 0.05      | 0.08      | 0.07      | 0.03      | 0.03      | 0.05        | 0.02      | 0.10      | 0.07      |
| Total                          | 99.0      | 98.1      | 98.6      | 99.2      | 98.3      | 98.7      | 98.4      | 99.0      | 98.6      | 98.0      | 98.6      | 98.6      | 98.6        | 98.6      | 98.6      | 98.5      |
| Ti                             | 0.00      | 0.02      | 0.01      | 0.00      | 0.00      | 0.00      | 0.00      | 0.00      | 0.01      | 0.01      | 0.00      | 0.00      | 0.01        | 0.01      | 0.01      | 0.00      |
| Al                             | 0.48      | 0.07      | 0.44      | 0.36      | 0.24      | 0.39      | 0.33      | 0.28      | 0.20      | 0.45      | 0.49      | 0.41      | 0.48        | 0.23      | 0.34      | 0.17      |
| Cr                             | 1.47      | 1.54      | 1.54      | 1.60      | 1.71      | 1.41      | 1.65      | 1.68      | 1.55      | 1.54      | 1.51      | 1.55      | 1.50        | 1.61      | 1.48      | 1.63      |
| Fe <sup>3+</sup>               | 0.05      | 0.35      | 0.01      | 0.04      | 0.05      | 0.20      | 0.01      | 0.04      | 0.24      | 0.00      | 0.00      | 0.03      | 0.01        | 0.15      | 0.16      | 0.20      |
| Fe <sup>2+</sup>               | 0.61      | 0.79      | 0.56      | 0.59      | 0.73      | 0.64      | 0.69      | 0.64      | 0.78      | 0.59      | 0.58      | 0.65      | 0.57        | 0.74      | 0.68      | 0.72      |
| Mn                             | 0.01      | 0.01      | 0.01      | 0.01      | 0.01      | 0.01      | 0.01      | 0.01      | 0.01      | 0.01      | 0.01      | 0.01      | 0.01        | 0.01      | 0.01      | 0.01      |
| Mg                             | 0.38      | 0.22      | 0.43      | 0.40      | 0.27      | 0.35      | 0.31      | 0.35      | 0.21      | 0.40      | 0.41      | 0.34      | 0.42        | 0.26      | 0.31      | 0.26      |
| Na                             | 0.00      | 0.00      | 0.00      | 0.00      | 0.00      | 0.00      | 0.00      | 0.00      | 0.01      | 0.00      | 0.00      | 0.00      | 0.00        | 0.00      | 0.01      | 0.01      |
| Total                          | 3.00      | 3.00      | 3.00      | 3.00      | 3.00      | 3.00      | 3.00      | 3.00      | 3.00      | 3.00      | 3.00      | 3.00      | 3.00        | 3.00      | 3.00      | 3.00      |
| Cr <sup>#</sup>                | 0.75      | 0.96      | 0.79      | 0.81      | 0.88      | 0.78      | 0.83      | 0.86      | 0.88      | 0.77      | 0.75      | 0.79      | 0.76        | 0.87      | 0.81      | 0.90      |
| XFe <sup>3+</sup>              | 0.02      | 0.18      | 0.00      | 0.02      | 0.03      | 0.10      | 0.01      | 0.02      | 0.12      | 0.00      | 0.00      | 0.02      | 0.01        | 0.08      | 0.08      | 0.10      |
| Mg <sup>#</sup>                | 0.39      | 0.22      | 0.43      | 0.41      | 0.27      | 0.36      | 0.31      | 0.35      | 0.21      | 0.40      | 0.41      | 0.35      | 0.42        | 0.26      | 0.32      | 0.27      |

Note: Cr<sup>#</sup>=atomic ratio of Cr/(Cr+Al) in Cr-spinel, XFe<sup>3+</sup>=atomic ratio of Fe<sup>3+</sup>/[Fe<sup>3+</sup>+Al+Cr<sup>3+</sup>], Mg<sup>#</sup>=atomic ratio of Mg/(Mg+Fe<sup>2+</sup>). "B.D." means below the limit of detection.

Table S5 Representative composition of chlorite and epidote in Hujialin clinopyroxenite and dunite (wt.%)

| Comment                        | HJ8-Q1-3                | HJ8-Q3-1 | HJ16-Q7-1 | HJ9-Q2-1                | HJ10-Q10-1 | HJ10-Q6-1 | HJ12-Q6-1 | HJ19-Q3-1 | HJ19-Q4-1 | HJ29-Q1-1 | Comment                        | HJ6-Q3-1               | HJ6-Q3-2 | HJ6-Q3-3 | HJ6-Q3-4 | HJ2-Q1-2                | HJ2-Q1-3 | HJ2-Q6-1 | HJ12-Q2-1 | HJ19-Q4-2 |
|--------------------------------|-------------------------|----------|-----------|-------------------------|------------|-----------|-----------|-----------|-----------|-----------|--------------------------------|------------------------|----------|----------|----------|-------------------------|----------|----------|-----------|-----------|
|                                | Type-2A clinopyroxenite |          |           | Type-2B clinopyroxenite |            |           | Dunite    |           |           |           |                                | Type-1 clinopyroxenite |          |          |          | Type-2B clinopyroxenite |          |          |           |           |
|                                | Chl                     | Chl      | Chl       | Chl                     | Chl        | Chl       | Chl       | Chl       | Chl       | Chl       |                                | Ep                     | Ep       | Ep       | Ep       | Ep                      | Ep       | Ep       | Ep        | Ep        |
| SiO <sub>2</sub>               | 30.2                    | 30.6     | 28.8      | 26.8                    | 27.7       | 27.8      | 26.8      | 29.1      | 28.9      | 35.2      | SiO <sub>2</sub>               | 37.9                   | 37.9     | 36.4     | 37.9     | 38.4                    | 37.6     | 38.1     | 37.4      | 38.0      |
| TiO <sub>2</sub>               | 0.02                    | B.D.     | 0.08      | B.D.                    | 0.06       | 0.09      | 0.13      | 0.03      | 0.04      | 0.08      | TiO <sub>2</sub>               | 0.20                   | 0.47     | 0.19     | 0.36     | 0.40                    | 0.12     | 0.19     | 0.13      | 0.16      |
| Al <sub>2</sub> O <sub>3</sub> | 18.4                    | 18.5     | 19.6      | 20.7                    | 20.3       | 20.4      | 21.2      | 19.8      | 20.6      | 11.2      | Al <sub>2</sub> O <sub>3</sub> | 23.9                   | 23.7     | 24.5     | 24.4     | 25.3                    | 24.0     | 24.6     | 24.3      | 24.0      |
| Cr <sub>2</sub> O <sub>3</sub> | 0.12                    | 0.14     | 0.40      | 0.42                    | 0.34       | 0.27      | 0.17      | 0.81      | 0.52      | 2.47      | Cr <sub>2</sub> O <sub>3</sub> | 0.04                   | 0.01     | 0.04     | 0.05     | 0.35                    | 0.31     | 0.44     | 0.22      | 0.36      |
| FeO                            | 1.99                    | 1.91     | 5.19      | 9.21                    | 11.17      | 10.63     | 9.29      | 5.67      | 6.04      | 1.20      | FeO                            | 7.86                   | 8.17     | 7.31     | 6.76     | 5.21                    | 6.99     | 6.47     | 7.21      | 7.19      |
| MnO                            | B.D.                    | 0.01     | 0.03      | 0.02                    | B.D.       | 0.07      | B.D.      | 0.02      | 0.03      | 0.02      | MnO                            | 0.02                   | 0.05     | 0.02     | 0.02     | B.D.                    | B.D.     | 0.03     | 0.01      | B.D.      |
| MgO                            | 31.1                    | 31.4     | 29.8      | 25.4                    | 24.8       | 25.2      | 25.4      | 29.8      | 29.2      | 33.3      | MgO                            | 0.05                   | 0.10     | 0.19     | 0.09     | 0.28                    | 0.25     | 0.14     | 0.09      | 0.12      |
| CaO                            | 0.02                    | B.D.     | B.D.      | 0.04                    | B.D.       | 0.02      | 0.02      | 0.04      | 0.02      | 0.04      | CaO                            | 22.5                   | 22.8     | 22.4     | 22.8     | 23.1                    | 22.7     | 23.1     | 22.9      | 22.9      |
| Na <sub>2</sub> O              | 0.08                    | 0.03     | 0.08      | B.D.                    | 0.02       | 0.12      | 0.07      | 0.02      | 0.04      | 0.07      | Na <sub>2</sub> O              | 0.02                   | 0.03     | B.D.     | 0.02     | 0.04                    | 0.02     | B.D.     | 0.06      | 0.01      |
| K <sub>2</sub> O               | 0.06                    | 0.04     | 0.05      | 0.02                    | 0.10       | 0.02      | 0.06      | 0.03      | 0.02      | 0.07      | K <sub>2</sub> O               | B.D.                   | 0.01     | 0.01     | B.D.     | B.D.                    | 0.01     | B.D.     | 0.04      | 0.01      |
| Total                          | 82.0                    | 82.5     | 84.0      | 82.6                    | 84.5       | 84.7      | 83.1      | 85.3      | 85.4      | 83.6      | Total                          | 92.4                   | 93.2     | 91.0     | 92.4     | 93.1                    | 92.0     | 93.1     | 92.4      | 92.7      |
| O=14                           |                         |          |           |                         |            |           |           |           |           |           | Si                             | 3.13                   | 3.13     | 3.06     | 3.15     | 3.16                    | 3.15     | 3.16     | 3.11      | 3.15      |
| Si                             | 2.99                    | 3.01     | 2.85      | 2.75                    | 2.81       | 2.80      | 2.73      | 2.84      | 2.82      | 3.42      | Ti                             | 0.01                   | 0.03     | 0.01     | 0.02     | 0.03                    | 0.01     | 0.01     | 0.01      | 0.01      |
| Ti                             | 0.00                    | 0.00     | 0.01      | 0.00                    | 0.01       | 0.01      | 0.01      | 0.00      | 0.00      | 0.01      | Al                             | 2.33                   | 2.31     | 2.43     | 2.39     | 2.45                    | 2.37     | 2.40     | 2.39      | 2.35      |
| Al                             | 2.15                    | 2.14     | 2.28      | 2.51                    | 2.42       | 2.43      | 2.55      | 2.28      | 2.37      | 1.28      | Cr                             | 0.00                   | 0.00     | 0.00     | 0.00     | 0.02                    | 0.02     | 0.03     | 0.02      | 0.02      |
| Cr                             | 0.01                    | 0.01     | 0.03      | 0.03                    | 0.03       | 0.02      | 0.01      | 0.06      | 0.04      | 0.19      | Fe <sup>3+</sup>               | 0.35                   | 0.24     | 0.31     | 0.14     | 0.00                    | 0.12     | 0.02     | 0.20      | 0.13      |
| Fe <sup>2+</sup>               | 0.17                    | 0.16     | 0.43      | 0.79                    | 0.95       | 0.90      | 0.79      | 0.46      | 0.49      | 0.10      | Fe <sup>2+</sup>               | 0.19                   | 0.32     | 0.21     | 0.33     | 0.36                    | 0.37     | 0.43     | 0.30      | 0.37      |
| Mn                             | 0.00                    | 0.00     | 0.00      | 0.00                    | 0.00       | 0.01      | 0.00      | 0.00      | 0.00      | 0.00      | Mn                             | 0.00                   | 0.00     | 0.00     | 0.00     | 0.00                    | 0.00     | 0.00     | 0.00      | 0.00      |
| Mg                             | 4.59                    | 4.60     | 4.38      | 3.89                    | 3.74       | 3.79      | 3.87      | 4.33      | 4.24      | 4.83      | Mg                             | 0.01                   | 0.01     | 0.02     | 0.01     | 0.04                    | 0.03     | 0.02     | 0.01      | 0.02      |
| Ca                             | 0.00                    | 0.00     | 0.00      | 0.00                    | 0.00       | 0.00      | 0.00      | 0.00      | 0.00      | 0.00      | Ca                             | 1.99                   | 2.02     | 2.02     | 2.03     | 2.03                    | 2.03     | 2.05     | 2.04      | 2.04      |
| Na                             | 0.02                    | 0.01     | 0.02      | 0.00                    | 0.00       | 0.02      | 0.01      | 0.00      | 0.01      | 0.01      | Na                             | 0.00                   | 0.00     | 0.00     | 0.00     | 0.01                    | 0.00     | 0.00     | 0.01      | 0.00      |
| K                              | 0.01                    | 0.01     | 0.01      | 0.00                    | 0.01       | 0.02      | 0.01      | 0.00      | 0.00      | 0.01      | K                              | 0.00                   | 0.00     | 0.00     | 0.00     | 0.00                    | 0.00     | 0.00     | 0.00      | 0.00      |
| Total                          | 9.94                    | 9.92     | 10.00     | 9.98                    | 9.97       | 9.99      | 9.99      | 9.99      | 9.98      | 9.85      | Total                          | 8.02                   | 8.07     | 8.06     | 8.07     | 8.09                    | 8.09     | 8.11     | 8.09      | 8.09      |
|                                |                         |          |           |                         |            |           |           |           |           |           | XFe                            | 0.13                   | 0.09     | 0.11     | 0.06     | 0.00                    | 0.05     | 0.01     | 0.08      | 0.05      |

Note: XFe= atomic ratio of Fe<sup>3+</sup>/(Al+Fe<sup>3+</sup>) in epidote. "B.D." means below the limit of detection.

Table S6 Representative composition of amphibole and serpentine in Hujialin clinopyroxenite and dunite (wt.%)

| Comment                        | HJ1-Q3-1               | HJ1-Q6-1  | HJ6-Q7-1  | HJ8-Q4-1                | HJ8-Q6-1  | HJ16-Q2-1 | HJ9-Q2-2                | HJ9-Q5-1  | HJ9-Q7-1  | HJ27-Q2-1 | Comment                        | HJ20-Q1-1 | HJ25-Q4-3 | HJ25-Q5-1 | HJ27-Q1-1 | HJ28-Q5-1-1 |
|--------------------------------|------------------------|-----------|-----------|-------------------------|-----------|-----------|-------------------------|-----------|-----------|-----------|--------------------------------|-----------|-----------|-----------|-----------|-------------|
|                                | Type-1 clinopyroxenite |           |           | Type-2A clinopyroxenite |           |           | Type-2B clinopyroxenite |           |           | Dunite    |                                | Dunite    | Dunite    | Dunite    | Dunite    | Dunite      |
|                                | pargasite              | pargasite | pargasite | pargasite               | pargasite | pargasite | pargasite               | pargasite | pargasite | tremolite |                                | Ser       | Ser       | Ser       | Ser       | Ser         |
| SiO <sub>2</sub>               | 45.1                   | 44.3      | 44.5      | 45.1                    | 45.4      | 45.3      | 44.5                    | 43.9      | 44.6      | 58.8      | SiO <sub>2</sub>               | 44.0      | 42.4      | 41.2      | 59.3      | 43.8        |
| TiO <sub>2</sub>               | 0.44                   | 0.35      | 0.27      | 0.13                    | 0.14      | 0.16      | 0.33                    | B.D.      | 0.03      | B.D.      | TiO <sub>2</sub>               | 0.02      | 0.06      | B.D.      | 0.04      | 0.03        |
| Al <sub>2</sub> O <sub>3</sub> | 14.5                   | 14.4      | 14.2      | 13.1                    | 13.1      | 13.5      | 13.4                    | 12.7      | 12.5      | 0.21      | Al <sub>2</sub> O <sub>3</sub> | 0.13      | 0.11      | B.D.      | 0.14      | 0.02        |
| FeO                            | 6.13                   | 6.27      | 7.35      | 2.91                    | 2.92      | 4.46      | 8.50                    | 4.15      | 4.12      | 0.88      | Cr <sub>2</sub> O <sub>3</sub> | 0.01      | 0.08      | B.D.      | 0.02      | 0.04        |
| MnO                            | B.D.                   | B.D.      | 0.01      | 0.01                    | 0.01      | 0.01      | 0.04                    | 0.01      | B.D.      | 0.05      | FeO                            | 1.12      | 0.79      | 1.52      | 0.59      | 0.49        |
| MgO                            | 16.3                   | 15.7      | 15.1      | 18.1                    | 18.2      | 17.5      | 14.6                    | 18.3      | 18.4      | 24.4      | MnO                            | 0.03      | 0.00      | 0.04      | 0.01      | B.D.        |
| CaO                            | 10.5                   | 10.8      | 10.6      | 12.4                    | 12.1      | 12.0      | 12.5                    | 12.1      | 12.0      | 13.0      | MgO                            | 39.1      | 40.2      | 43.0      | 29.5      | 43.1        |
| Na <sub>2</sub> O              | 3.05                   | 3.02      | 2.98      | 2.70                    | 3.01      | 2.23      | 1.51                    | 2.83      | 2.40      | 0.09      | CaO                            | B.D.      | B.D.      | B.D.      | 0.04      | 0.01        |
| K <sub>2</sub> O               | 1.80                   | 1.59      | 0.96      | 0.69                    | 0.77      | 0.88      | 0.47                    | 0.60      | 1.10      | 0.02      | Na <sub>2</sub> O              | 0.04      | B.D.      | 0.05      | 0.15      | B.D.        |
| F                              | 0.07                   | 0.29      | 0.07      | 0.07                    | 0.18      | 0.09      | 0.10                    | 0.34      | 0.09      | 0.09      | K <sub>2</sub> O               | 0.01      | 0.01      | 0.04      | 0.07      | B.D.        |
| Cl                             | 0.06                   | 0.14      | 0.08      | 0.03                    | 0.04      | 0.10      | 0.09                    | 0.09      | 0.06      | B.D.      |                                |           |           |           |           |             |
| Total                          | 98.0                   | 96.7      | 96.1      | 95.2                    | 95.9      | 96.2      | 96.1                    | 95.1      | 95.3      | 97.5      | Total                          | 84.4      | 83.6      | 85.8      | 89.8      | 87.5        |
| Si                             | 6.43                   | 6.40      | 6.47      | 6.51                    | 6.51      | 6.50      | 6.50                    | 6.40      | 6.48      | 7.99      | Si                             | 5.95      | 5.81      | 5.56      | 7.25      | 5.74        |
| Al <sup>IV</sup>               | 1.57                   | 1.60      | 1.53      | 1.49                    | 1.49      | 1.50      | 1.50                    | 1.60      | 1.52      | 0.01      | Ti                             | 0.00      | 0.01      | 0.00      | 0.00      | 0.00        |
| Al <sup>VI</sup>               | 0.86                   | 0.84      | 0.90      | 0.73                    | 0.72      | 0.78      | 0.80                    | 0.58      | 0.62      | 0.03      | Al                             | 0.02      | 0.02      | 0.00      | 0.02      | 0.00        |
| Ti                             | 0.05                   | 0.04      | 0.03      | 0.01                    | 0.01      | 0.02      | 0.04                    | 0.00      | 0.00      | 0.00      | Cr                             | 0.00      | 0.01      | 0.00      | 0.00      | 0.01        |
| Fe <sup>3+</sup>               | 0.13                   | 0.17      | 0.23      | 0.21                    | 0.18      | 0.30      | 0.47                    | 0.13      | 0.14      | 0.10      | Fe <sup>3+</sup>               | 0.08      | 0.06      | 0.12      | 0.00      | 0.04        |
| Fe <sup>2+</sup>               | 0.60                   | 0.59      | 0.66      | 0.14                    | 0.17      | 0.24      | 0.57                    | 0.38      | 0.36      | 0.00      | Fe <sup>2+</sup>               | 0.05      | 0.03      | 0.05      | 0.06      | 0.02        |
| Mn                             | 0.00                   | 0.00      | 0.00      | 0.00                    | 0.00      | 0.00      | 0.00                    | 0.00      | 0.00      | 0.01      | Mn                             | 0.00      | 0.00      | 0.00      | 0.00      | 0.00        |
| Mg                             | 3.46                   | 3.38      | 3.28      | 3.90                    | 3.90      | 3.75      | 3.18                    | 3.97      | 3.99      | 4.94      | Mg                             | 7.88      | 8.21      | 8.64      | 5.37      | 8.42        |
| Ca                             | 1.61                   | 1.67      | 1.65      | 1.91                    | 1.85      | 1.84      | 1.96                    | 1.90      | 1.87      | 1.89      | Ca                             | 0.00      | 0.00      | 0.00      | 0.01      | 0.00        |
| Na                             | 0.84                   | 0.85      | 0.84      | 0.75                    | 0.84      | 0.62      | 0.43                    | 0.80      | 0.68      | 0.02      | Na                             | 0.01      | 0.00      | 0.01      | 0.04      | 0.00        |
| K                              | 0.33                   | 0.29      | 0.18      | 0.13                    | 0.14      | 0.16      | 0.09                    | 0.11      | 0.20      | 0.00      | K                              | 0.00      | 0.00      | 0.01      | 0.01      | 0.00        |
| Total                          | 15.87                  | 15.83     | 15.77     | 15.79                   | 15.82     | 15.70     | 15.53                   | 15.87     | 15.86     | 14.98     | Total                          | 14.0      | 14.1      | 14.4      | 12.8      | 14.2        |
| Si <sub>T</sub> <sup>#</sup>   | 6.43                   | 6.40      | 6.47      | 6.51                    | 6.51      | 6.50      | 6.50                    | 6.40      | 6.48      | 7.99      | Mg <sup>#</sup>                | 0.99      | 1.00      | 0.99      | 0.99      | 1.00        |
| Al <sub>T</sub>                | 1.57                   | 1.60      | 1.53      | 1.49                    | 1.49      | 1.50      | 1.50                    | 1.60      | 1.52      | 0.01      |                                |           |           |           |           |             |
| Total                          | 8.00                   | 8.00      | 8.00      | 8.00                    | 8.00      | 8.00      | 8.00                    | 8.00      | 8.00      | 8.00      |                                |           |           |           |           |             |
| Al <sub>C</sub>                | 0.86                   | 0.84      | 0.90      | 0.73                    | 0.72      | 0.78      | 0.80                    | 0.58      | 0.62      | 0.03      |                                |           |           |           |           |             |
| Fe <sup>3+</sup> <sub>C</sub>  | 0.13                   | 0.17      | 0.23      | 0.21                    | 0.18      | 0.30      | 0.47                    | 0.13      | 0.14      | 0.10      |                                |           |           |           |           |             |
| Ti <sub>C</sub>                | 0.05                   | 0.04      | 0.03      | 0.01                    | 0.01      | 0.02      | 0.04                    | 0.00      | 0.00      | 0.00      |                                |           |           |           |           |             |
| Mg <sub>C</sub>                | 3.46                   | 3.38      | 3.28      | 3.90                    | 3.90      | 3.75      | 3.18                    | 3.97      | 3.99      | 4.87      |                                |           |           |           |           |             |
| Fe <sup>2+</sup> <sub>C</sub>  | 0.51                   | 0.57      | 0.56      | 0.14                    | 0.17      | 0.16      | 0.51                    | 0.31      | 0.25      | 0.00      |                                |           |           |           |           |             |
| Total                          | 5.00                   | 5.00      | 5.00      | 4.99                    | 4.98      | 5.00      | 5.00                    | 5.00      | 5.00      | 5.00      |                                |           |           |           |           |             |
| Fe <sup>2+</sup> <sub>B</sub>  | 0.10                   | 0.02      | 0.10      | 0.00                    | 0.00      | 0.08      | 0.06                    | 0.06      | 0.11      | 0.00      |                                |           |           |           |           |             |
| Mn <sub>B</sub>                | 0.00                   | 0.00      | 0.00      | 0.00                    | 0.00      | 0.00      | 0.00                    | 0.00      | 0.00      | 0.01      |                                |           |           |           |           |             |
| Ca <sub>B</sub>                | 1.61                   | 1.67      | 1.65      | 1.91                    | 1.85      | 1.84      | 1.94                    | 1.90      | 1.87      | 1.89      |                                |           |           |           |           |             |
| Na <sub>B</sub>                | 0.30                   | 0.31      | 0.25      | 0.09                    | 0.15      | 0.08      | 0.00                    | 0.04      | 0.02      | 0.02      |                                |           |           |           |           |             |
| Total                          | 2.00                   | 2.00      | 2.00      | 2.00                    | 2.00      | 2.00      | 2.00                    | 2.00      | 2.00      | 1.92      |                                |           |           |           |           |             |
| Ca <sub>A</sub>                | 0.00                   | 0.00      | 0.00      | 0.00                    | 0.00      | 0.00      | 0.02                    | 0.00      | 0.00      | 0.00      |                                |           |           |           |           |             |
| Na <sub>A</sub>                | 0.54                   | 0.53      | 0.59      | 0.67                    | 0.69      | 0.54      | 0.43                    | 0.76      | 0.66      | 0.02      |                                |           |           |           |           |             |
| K <sub>A</sub>                 | 0.33                   | 0.29      | 0.18      | 0.13                    | 0.14      | 0.16      | 0.09                    | 0.11      | 0.20      | 0.00      |                                |           |           |           |           |             |
| Total                          | 0.87                   | 0.83      | 0.77      | 0.79                    | 0.83      | 0.70      | 0.53                    | 0.87      | 0.86      | 0.03      |                                |           |           |           |           |             |

Note: Mg<sup>#</sup>= atomic ratio of Mg/(Mg+Fe<sup>2+</sup>) in serpentine. "B.D." means below the limit of detection.



Table S7 Bulk rock major and minor element compositions of garnet clinopyroxenite and dunite at Hujialin

| Samples                        | HJ-1                   | HJ-6                   | HJ-8                    | HJ-16                   | HJ-2                    | HJ-9                    | HJ-10   | HJ-12   | HJ-19   | HJ-20  | HJ-23  | HJ-25  | HJ-27  | HJ-28  | HJ-29  |
|--------------------------------|------------------------|------------------------|-------------------------|-------------------------|-------------------------|-------------------------|---------|---------|---------|--------|--------|--------|--------|--------|--------|
|                                | Type-1 clinopyroxenite | Type-1 clinopyroxenite | Type-2A clinopyroxenite | Type-2A clinopyroxenite | Type-2B clinopyroxenite | Type-2B clinopyroxenite |         |         |         | Dunite |        |        |        |        |        |
| Major elements in wt.%         |                        |                        |                         |                         |                         |                         |         |         |         |        |        |        |        |        |        |
| SiO <sub>2</sub>               | 45.9                   | 44.9                   | 46.0                    | 45.9                    | 46.2                    | 46.2                    | 46.3    | 46.6    | 47.5    | 38.2   | 38.2   | 38.7   | 38.5   | 38.6   | 39.8   |
| Al <sub>2</sub> O <sub>3</sub> | 13.2                   | 13.9                   | 9.28                    | 8.40                    | 5.28                    | 8.36                    | 4.86    | 5.01    | 4.84    | 0.15   | 0.15   | 0.10   | 0.13   | 0.10   | 0.23   |
| TiO <sub>2</sub>               | 1.86                   | 1.82                   | 1.53                    | 2.00                    | 2.30                    | 1.57                    | 2.18    | 1.90    | 1.86    | 0.01   | 0.01   | 0.01   | 0.01   | 0.01   | 0.01   |
| Fe <sub>2</sub> O <sub>3</sub> | 9.22                   | 9.87                   | 8.55                    | 8.55                    | 10.73                   | 8.54                    | 10.62   | 9.65    | 9.29    | 8.06   | 8.07   | 7.89   | 8.16   | 8.20   | 7.72   |
| MnO                            | 0.10                   | 0.12                   | 0.11                    | 0.10                    | 0.11                    | 0.10                    | 0.11    | 0.12    | 0.11    | 0.16   | 0.15   | 0.14   | 0.17   | 0.17   | 0.11   |
| MgO                            | 9.38                   | 9.74                   | 13.7                    | 12.6                    | 13.6                    | 14.2                    | 14.1    | 14.4    | 13.8    | 47.6   | 47.8   | 48.1   | 48.6   | 48.8   | 46.6   |
| CaO                            | 17.9                   | 17.6                   | 18.8                    | 20.0                    | 19.5                    | 18.6                    | 19.5    | 19.9    | 20.1    | 0.13   | 0.06   | 0.09   | 0.05   | 0.08   | 0.35   |
| Na <sub>2</sub> O              | 2.07                   | 1.52                   | 0.54                    | 0.61                    | 0.59                    | 0.57                    | 0.52    | 0.46    | 0.63    | 0.04   | 0.03   | 0.04   | 0.02   | 0.03   | 0.04   |
| K <sub>2</sub> O               | 0.12                   | 0.10                   | 0.06                    | 0.04                    | 0.04                    | 0.10                    | 0.08    | 0.04    | 0.10    | 0.01   | 0.01   | 0.01   | 0.01   | 0.01   | 0.01   |
| P <sub>2</sub> O <sub>5</sub>  | 0.03                   | 0.02                   | 0.02                    | 0.01                    | 0.02                    | 0.02                    | 0.01    | 0.01    | 0.01    | 0.01   | 0.01   | 0.01   | 0.01   | 0.01   | 0.02   |
| Sum                            | 99.8                   | 99.6                   | 98.5                    | 98.2                    | 98.3                    | 98.2                    | 98.3    | 98.0    | 98.2    | 94.4   | 94.5   | 95.1   | 95.7   | 96.0   | 94.8   |
| LOS                            | 0.08                   | 0.12                   | 0.75                    | 0.80                    | 0.88                    | 0.86                    | 0.89    | 0.86    | 0.60    | 4.30   | 4.88   | 3.58   | 4.31   | 2.52   | 3.48   |
| Total                          | 99.9                   | 99.7                   | 99.3                    | 99.0                    | 99.2                    | 99.1                    | 99.2    | 98.9    | 98.8    | 98.7   | 99.4   | 98.7   | 100.0  | 98.5   | 98.3   |
| Mg <sup>#</sup>                | 67.1                   | 66.4                   | 76.2                    | 74.7                    | 71.7                    | 76.9                    | 72.7    | 74.8    | 74.8    | 92.2   | 92.2   | 92.4   | 92.2   | 92.2   | 92.3   |
| Trace elements in ppm          |                        |                        |                         |                         |                         |                         |         |         |         |        |        |        |        |        |        |
| La                             | 4.95                   | 6.12                   | 2.07                    | 1.00                    | 2.73                    | 1.99                    | 1.67    | 1.95    | 1.67    | 0.16   | 0.19   | 0.14   | 0.12   | 0.16   | 0.20   |
| Ce                             | 23.5                   | 26.4                   | 5.89                    | 4.66                    | 8.24                    | 5.78                    | 6.31    | 6.84    | 5.62    | 0.30   | 0.31   | 0.27   | 0.22   | 0.31   | 0.44   |
| Pr                             | 4.12                   | 4.49                   | 1.15                    | 1.19                    | 1.72                    | 1.28                    | 1.41    | 1.46    | 1.33    | 0.04   | 0.04   | 0.03   | 0.02   | 0.03   | 0.06   |
| Nd                             | 26.8                   | 27.0                   | 7.80                    | 9.20                    | 12.0                    | 9.08                    | 10.2    | 10.4    | 9.60    | 0.15   | 0.15   | 0.15   | 0.11   | 0.15   | 0.33   |
| Sm                             | 6.31                   | 6.10                   | 2.18                    | 2.96                    | 3.38                    | 2.63                    | 2.96    | 3.06    | 2.75    | 0.03   | 0.03   | 0.03   | 0.02   | 0.03   | 0.07   |
| Eu                             | 1.99                   | 1.90                   | 0.65                    | 0.81                    | 0.83                    | 0.80                    | 0.74    | 0.76    | 0.70    | 0.01   | 0.01   | <0.01  | <0.01  | 0.01   | 0.02   |
| Gd                             | 4.61                   | 4.42                   | 2.16                    | 3.07                    | 3.02                    | 2.58                    | 2.79    | 2.83    | 2.61    | 0.02   | 0.02   | 0.02   | 0.02   | 0.02   | 0.07   |
| Tb                             | 0.53                   | 0.57                   | 0.30                    | 0.41                    | 0.43                    | 0.35                    | 0.38    | 0.38    | 0.35    | <0.01  | <0.01  | <0.01  | <0.01  | <0.01  | 0.01   |
| Dy                             | 2.57                   | 2.93                   | 1.84                    | 2.30                    | 2.37                    | 2.06                    | 2.22    | 2.20    | 2.00    | 0.02   | 0.02   | 0.02   | 0.02   | 0.02   | 0.07   |
| Ho                             | 0.34                   | 0.42                   | 0.27                    | 0.32                    | 0.36                    | 0.30                    | 0.32    | 0.32    | 0.29    | <0.01  | <0.01  | <0.01  | <0.01  | <0.01  | 0.01   |
| Er                             | 0.72                   | 0.96                   | 0.76                    | 0.83                    | 0.85                    | 0.80                    | 0.81    | 0.80    | 0.76    | 0.01   | 0.01   | 0.01   | 0.01   | 0.01   | 0.04   |
| Tm                             | 0.07                   | 0.10                   | 0.08                    | 0.08                    | 0.09                    | 0.08                    | 0.08    | 0.08    | 0.07    | <0.01  | <0.01  | <0.01  | <0.01  | <0.01  | 0.01   |
| Yb                             | 0.41                   | 0.60                   | 0.48                    | 0.49                    | 0.52                    | 0.46                    | 0.48    | 0.47    | 0.44    | 0.01   | 0.01   | 0.01   | 0.01   | 0.01   | 0.05   |
| Lu                             | 0.05                   | 0.08                   | 0.06                    | 0.06                    | 0.07                    | 0.06                    | 0.06    | 0.06    | 0.06    | <0.01  | <0.01  | <0.01  | <0.01  | <0.01  | 0.01   |
| Y                              | 7.07                   | 8.86                   | 5.75                    | 6.76                    | 7.00                    | 6.22                    | 6.52    | 6.63    | 5.81    | 0.11   | 0.10   | 0.10   | 0.09   | 0.09   | 0.39   |
| ΣREE                           | 84.0                   | 91.0                   | 31.4                    | 34.1                    | 43.6                    | 34.5                    | 36.9    | 38.3    | 34.1    | 0.85   | 0.86   | 0.77   | 0.63   | 0.83   | 1.78   |
| LREE                           | 67.7                   | 72.0                   | 19.7                    | 19.8                    | 28.9                    | 21.6                    | 23.3    | 24.5    | 21.7    | 0.68   | 0.71   | 0.62   | 0.50   | 0.69   | 1.12   |
| HREE                           | 16.4                   | 18.9                   | 11.7                    | 14.3                    | 14.7                    | 12.9                    | 13.7    | 13.8    | 12.4    | 0.18   | 0.16   | 0.17   | 0.15   | 0.15   | 0.66   |
| LREE/HRE                       | 4.13                   | 3.81                   | 1.68                    | 1.38                    | 1.97                    | 1.67                    | 1.70    | 1.78    | 1.75    | 3.78   | 4.44   | 3.65   | 3.33   | 4.60   | 1.70   |
| δEu                            | 1.08                   | 1.06                   | 0.90                    | 0.81                    | 0.78                    | 0.93                    | 0.77    | 0.78    | 0.79    | 0.80   | 0.81   | 0.00   | 0.00   | 0.57   | 0.69   |
| Li                             | 3.95                   | 4.30                   | 2.32                    | 2.65                    | 2.04                    | 2.18                    | 1.85    | 1.34    | 2.55    | 2.45   | 2.41   | 3.18   | 2.10   | 1.96   | 3.22   |
| Be                             | 0.34                   | 0.31                   | 0.17                    | 0.13                    | 0.16                    | 0.07                    | 0.11    | 0.11    | 0.20    | 0.03   | 0.04   | 0.03   | 0.04   | 0.02   | 0.06   |
| Sc                             | 26.0                   | 27.9                   | 63.2                    | 63.9                    | 69.6                    | 67.7                    | 71.5    | 73.4    | 77.1    | 4.11   | 4.81   | 5.49   | 5.05   | 4.39   | 5.95   |
| Ti                             | 12477.7                | 11424.4                | 9462.4                  | 11998.1                 | 14746.7                 | 9704.5                  | 13393.6 | 11521.4 | 10888.3 | 57.5   | 64.5   | 93.5   | 56.4   | 52.5   | 66.1   |
| V                              | 160.9                  | 164.4                  | 385.1                   | 383.3                   | 383.1                   | 385.0                   | 357.2   | 310.7   | 314.3   | 10.3   | 12.0   | 9.5    | 11.2   | 7.5    | 15.0   |
| Mn                             | 757.3                  | 839.8                  | 725.1                   | 724.3                   | 841.3                   | 748.1                   | 764.2   | 806.9   | 744.5   | 972.0  | 1072.3 | 987.8  | 1250.7 | 1128.2 | 741.3  |
| Co                             | 45.7                   | 50.2                   | 53.2                    | 39.3                    | 48.3                    | 56.8                    | 53.9    | 49.0    | 39.7    | 136.4  | 150.4  | 149.8  | 168.9  | 149.0  | 127.1  |
| Ni                             | 145.6                  | 130.8                  | 233.8                   | 164.2                   | 173.7                   | 253.9                   | 170.9   | 169.3   | 153.9   | 2957.7 | 3173.4 | 3231.0 | 3684.1 | 3142.3 | 2871.7 |
| Cu                             | 3.97                   | 5.13                   | 97.0                    | 5.59                    | 20.2                    | 65.5                    | 13.6    | 38.6    | 9.50    | 6.00   | 2.91   | 2.85   | 3.75   | 2.94   | 3.21   |
| Zn                             | 55.7                   | 51.4                   | 34.6                    | 35.7                    | 52.6                    | 40.9                    | 48.5    | 46.7    | 38.7    | 68.9   | 82.9   | 66.8   | 88.8   | 62.9   | 60.7   |
| Ga                             | 14.5                   | 14.4                   | 9.94                    | 11.0                    | 9.87                    | 9.43                    | 9.30    | 8.65    | 9.29    | 0.25   | 0.28   | 0.20   | 0.24   | 0.19   | 0.27   |
| As                             | 1.34                   | 1.37                   | 1.41                    | 1.21                    | 1.69                    | 1.20                    | 0.90    | 0.97    | 1.48    | 1.30   | 0.91   | 0.87   | 1.48   | 0.87   | 0.99   |
| Rb                             | 2.31                   | 2.30                   | 1.30                    | 0.74                    | 0.68                    | 2.35                    | 1.02    | 0.66    | 1.47    | 0.08   | 0.08   | 0.07   | 0.08   | 0.07   | 0.09   |
| Sr                             | 373.3                  | 295.9                  | 122.0                   | 128.6                   | 194.0                   | 183.9                   | 138.6   | 117.6   | 163.5   | 3.19   | 2.75   | 2.57   | 1.47   | 2.20   | 14.7   |
| Zr                             | 41.5                   | 47.4                   | 19.3                    | 17.1                    | 22.4                    | 15.2                    | 20.6    | 19.3    | 18.8    | 0.24   | 0.25   | 0.26   | 0.19   | 0.24   | 0.24   |
| Nb                             | 0.87                   | 0.86                   | 0.74                    | 0.37                    | 3.00                    | 0.48                    | 1.22    | 0.35    | 1.41    | 0.06   | 0.05   | 0.08   | 0.06   | 0.07   | 0.06   |
| Mo                             | 0.12                   | 0.10                   | 0.11                    | 0.09                    | 0.14                    | 0.10                    | 0.12    | 0.08    | 0.33    | 0.35   | 0.34   | 0.33   | 0.43   | 0.36   | 0.33   |
| In                             | 0.04                   | 0.04                   | 0.04                    | 0.05                    | 0.06                    | 0.04                    | 0.06    | 0.06    | 0.06    | <0.01  | <0.01  | <0.01  | <0.01  | <0.01  | <0.01  |
| Cs                             | 0.09                   | 0.06                   | 0.11                    | 0.09                    | 0.07                    | 0.04                    | 0.09    | 0.10    | 0.16    | 0.02   | 0.01   | 0.01   | 0.02   | 0.01   | 0.02   |
| Ba                             | 153.1                  | 95.6                   | 30.1                    | 24.3                    | 18.3                    | 61.1                    | 15.4    | 11.2    | 19.8    | 2.98   | 1.95   | 1.40   | 2.01   | 1.69   | 2.22   |
| Hf                             | 1.39                   | 1.43                   | 0.94                    | 1.10                    | 1.37                    | 0.95                    | 1.29    | 1.21    | 1.20    | 0.01   | 0.01   | 0.01   | 0.01   | 0.01   | 0.01   |
| Ta                             | 0.17                   | 0.18                   | 0.11                    | 0.05                    | 0.21                    | 0.06                    | 0.07    | 0.04    | 0.07    | 0.03   | 0.03   | 0.03   | 0.03   | 0.02   | 0.03   |
| W                              | 0.16                   | 0.23                   | 0.22                    | 0.20                    | 0.36                    | 0.24                    | 0.42    | 0.23    | 0.93    | 2.27   | 1.70   | 0.98   | 1.33   | 1.80   | 0.54   |
| Tl                             | 0.01                   | 0.01                   | 0.01                    | 0.01                    | 0.01                    | 0.01                    | 0.01    | 0.01    | 0.01    | <0.01  | <0.01  | <0.01  | <0.01  | <0.01  | <0.01  |
| Pb                             | 2.39                   | 2.47                   | 2.99                    | 4.10                    | 2.61                    | 2.97                    | 2.85    | 1.47    | 1.74    | 2.35   | 1.98   | 0.94   | 1.41   | 1.42   | 1.37   |
| Bi                             | 0.01                   | 0.01                   | 0.02                    | 0.01                    | 0.01                    | 0.01                    | 0.02    | 0.01    | 0.03    | 0.03   | 0.01   | 0.01   | 0.03   | 0.01   | 0.01   |
| Th                             | 0.12                   | 0.15                   | 0.13                    | 0.01                    | 0.07                    | 0.09                    | 0.03    | 0.03    | 0.02    | <0.01  | <0.01  | <0.01  | <0.01  | <0.01  | 0.02   |
| U                              | 0.03                   | 0.02                   | 0.02                    | 0.01                    | 0.01                    | 0.03                    | 0.02    | 0.01    | 0.01    | 0.02   | 0.02   | 0.01   | 0.01   | 0.01   | 0.03   |
| δSr                            | 1.02                   | 0.81                   | 1.06                    | 0.88                    | 1.09                    | 1.35                    | 0.90    | 0.74    | 1.14    | 1.61   | 1.53   | 1.37   | 1.00   | 1.12   | 3.32   |

Note: Mg<sup>#</sup>=atomic ratio of Mg\*100/[Mg+Fe<sub>total</sub>] in bulk rock. δEu=2\*Eu<sub>N</sub>/(Sm+Gd)<sub>N</sub>, δSr=2\*Sr<sub>N</sub>/(Sm+Nd)<sub>N</sub>. N: normalized value
